# Supplementary material
Source: publisher site journal article supplement (https://static.cambridge.org/content/id/urn:cambridge.org:id:article:S2052263020000056/resource/name/S2052263020000056supp001.docx)
Supplement: Supplementary file 1 [file S2052263020000056supp001.docx]

**Can Conversing with a Computer Increase Turnout?**

**Mobilization using Chatbot Communication**

**SUPPLEMENTAL MATERIALS**

**Supplemental Table 1:** Balance Check: Mean Values of Observable Covariates within Random Assignment Groups [All Records]

|  | Control | Treatment | Total |
| --- | --- | --- | --- |
| # of faxes sent | 1.610 | 1.492 | 1.556 |
| # of calls made | 0.0102 | 0.0125 | 0.0113 |
| # of letters mailed | 0.00526 | 0.00567 | 0.00545 |
| # of emails sent | 1.011 | 0.945 | 0.980 |
| # of editorials submitted | 0.00655 | 0.00642 | 0.00649 |
| zip3==530 | 0.0527 | 0.0514 | 0.0521 |
| zip3==531 | 0.0745 | 0.0781 | 0.0762 |
| zip3==532 | 0.142 | 0.139 | 0.141 |
| zip3==534 | 0.0146 | 0.0154 | 0.0150 |
| zip3==535 | 0.0717 | 0.0719 | 0.0718 |
| zip3==537 | 0.122 | 0.123 | 0.122 |
| zip3==538 | 0.00382 | 0.00359 | 0.00371 |
| zip3==539 | 0.0102 | 0.0111 | 0.0106 |
| zip3==540 | 0.0149 | 0.0148 | 0.0148 |
| zip3==541 | 0.0168 | 0.0154 | 0.0161 |
| zip3==542 | 0.00788 | 0.00590 | 0.00697 |
| zip3==543 | 0.0167 | 0.0198 | 0.0181 |
| zip3==544 | 0.0241 | 0.0252 | 0.0246 |
| zip3==545 | 0.00462 | 0.00533 | 0.00495 |
| zip3==546 | 0.0239 | 0.0235 | 0.0237 |
| zip3==547 | 0.0252 | 0.0247 | 0.0250 |
| zip3==548 | 0.0100 | 0.0110 | 0.0105 |
| zip3==549 | 0.0439 | 0.0460 | 0.0449 |
| Missing zip code | 0.320 | 0.315 | 0.318 |
| Matched by Catalist | 0.719 | 0.725 | 0.722 |
| Observations | 46069 |  |  |

**Supplemental Table 2:** Balance Check: Logistic Regression of Random Assignment on Observable Covariates [All Records]

|  | Random Assignment |  |
| --- | --- | --- |
| Experimental Condition |  |  |
| # of faxes sent | -0.001 | (0.001) |
| # of calls made | 0.033 | (0.038) |
| # of letters mailed | 0.073 | (0.105) |
| # of emails sent | -0.003 | (0.002) |
| # of editorials submitted | 0.002 | (0.070) |
| zip3==530 | -0.024 | (0.049) |
| zip3==531 | 0.046 | (0.043) |
| zip3==532 | -0.021 | (0.037) |
| zip3==534 | 0.055 | (0.081) |
| zip3==535 | 0.002 | (0.044) |
| zip3==537 | 0.010 | (0.038) |
| zip3==538 | -0.062 | (0.156) |
| zip3==539 | 0.087 | (0.094) |
| zip3==540 | -0.006 | (0.081) |
| zip3==541 | -0.086 | (0.079) |
| zip3==542 | -0.288* | (0.118) |
| zip3==543 | 0.172* | (0.074) |
| zip3==544 | 0.047 | (0.065) |
| zip3==545 | 0.143 | (0.135) |
| zip3==546 | -0.021 | (0.067) |
| zip3==547 | -0.018 | (0.065) |
| zip3==548 | 0.088 | (0.095) |
| zip3==549 | 0.049 | (0.052) |
| Matched by Catalist | 0.030 | (0.031) |
| Constant | -0.184*** | (0.018) |
| N | 46069 |  |
| LR | 30.014 |  |
| df | 24 |  |
| p_value | 0.184 |  |

Standard errors in parentheses

* *p* < 0.05, ** *p* < 0.01, *** *p* < 0.001

**Supplemental Table 3** Balance Check: Mean Values of Observable Covariates within Random Assignment Groups [Matched Records]

|  | Control | Treatment | Total |
| --- | --- | --- | --- |
| # of faxes sent | 2.209 | 2.024 | 2.123 |
| # of calls made | 0.0143 | 0.0172 | 0.0156 |
| # of letters mailed | 0.00732 | 0.00769 | 0.00749 |
| # of emails sent | 1.403 | 1.301 | 1.356 |
| # of editorials submitted | 0.00906 | 0.00879 | 0.00893 |
| zip3==530 | 0.0678 | 0.0658 | 0.0669 |
| zip3==531 | 0.0979 | 0.101 | 0.0994 |
| zip3==532 | 0.187 | 0.181 | 0.184 |
| zip3==534 | 0.0195 | 0.0195 | 0.0195 |
| zip3==535 | 0.0942 | 0.0922 | 0.0933 |
| zip3==537 | 0.160 | 0.161 | 0.160 |
| zip3==538 | 0.00509 | 0.00469 | 0.00490 |
| zip3==539 | 0.0134 | 0.0143 | 0.0138 |
| zip3==540 | 0.0191 | 0.0190 | 0.0191 |
| zip3==541 | 0.0219 | 0.0205 | 0.0213 |
| zip3==542 | 0.0102 | 0.00775 | 0.00908 |
| zip3==543 | 0.0212 | 0.0257 | 0.0233 |
| zip3==544 | 0.0320 | 0.0332 | 0.0325 |
| zip3==545 | 0.00632 | 0.00697 | 0.00662 |
| zip3==546 | 0.0318 | 0.0309 | 0.0314 |
| zip3==547 | 0.0329 | 0.0330 | 0.0330 |
| zip3==548 | 0.0131 | 0.0141 | 0.0135 |
| zip3==549 | 0.0574 | 0.0604 | 0.0588 |
| Missing zip code | 0.109 | 0.109 | 0.109 |
| Observations | 33243 |  |  |

**Supplemental Table 4:** Balance Check: Logistic Regression of Random Assignment on Observable Covariates [Matched Records]

|  | Random Assignment |  |
| --- | --- | --- |
| Experimental Condition |  |  |
| # of faxes sent | -0.001 | (0.001) |
| # of calls made | 0.033 | (0.038) |
| # of letters mailed | 0.062 | (0.105) |
| # of emails sent | -0.003 | (0.002) |
| # of editorials submitted | 0.002 | (0.070) |
| zip3==530 | -0.034 | (0.054) |
| zip3==531 | 0.024 | (0.048) |
| zip3==532 | -0.037 | (0.042) |
| zip3==534 | -0.004 | (0.086) |
| zip3==535 | -0.028 | (0.049) |
| zip3==537 | -0.003 | (0.043) |
| zip3==538 | -0.087 | (0.161) |
| zip3==539 | 0.064 | (0.099) |
| zip3==540 | -0.011 | (0.086) |
| zip3==541 | -0.072 | (0.083) |
| zip3==542 | -0.283* | (0.122) |
| zip3==543 | 0.185* | (0.079) |
| zip3==544 | 0.029 | (0.069) |
| zip3==545 | 0.092 | (0.139) |
| zip3==546 | -0.032 | (0.071) |
| zip3==547 | -0.003 | (0.069) |
| zip3==548 | 0.068 | (0.100) |
| zip3==549 | 0.047 | (0.056) |
| Constant | -0.142*** | (0.034) |
| N | 33243 |  |
| LR | 25.873 |  |
| df | 23 |  |
| p_value | 0.307 |  |

Standard errors in parentheses

* *p* < 0.05, ** *p* < 0.01, *** *p* < 0.001
